# Supplementary material for: Emission inventory of semi-volatile and intermediate volatility organic compounds and theireffectson SOA over the Pearl River Delta region
Source: Copernicus journal article supplement (doi:10.5194/acp-2018-1341), 2019-03-15
Supplement: Supplementary file 1 [file acp-2018-1341-supplement.pdf]

### S1. Additional descriptions on the parameters involved in equations

Additional details on the parameters involved in the estimation of S/IVOC emissions are listed as below:

$$E_{S/IVOCs,j} = \sum_{j,k} A_{j,k} \times EF_{S/IVOCs,j} \times (1-\mu) \times 10^{-3} \quad (S1)$$

- 5 where  $j$  and  $k$  denote the specific sector and city, respectively;  $E_{S/IVOCs}$  denotes the annual emissions of S/IVOCs;  $A$ ,  $EF$ , and  $\mu$  represent the activity level, average emission factor, and removal efficiency, respectively.

$$E_{S/IVOCs,j} = \sum_{j,k} A_{j,k} \times EF_{PM_{2.5},j} \times F_{OC,j} \times \frac{OM}{OC_j} \times \left( \frac{E_{SVOCs,j}}{E_{POA,j}} + \frac{E_{IVOCs,j}}{E_{POA,j}} \right) \times (1-\mu) \times 10^{-3} \quad (S2)$$

$$E_{S/IVOCs,j} = E_{PM_{2.5},j} \times F_{OC,j} \times \frac{OM}{OC_j} \times \left( \frac{E_{SVOCs,j}}{E_{POA,j}} + \frac{E_{IVOCs,j}}{E_{POA,j}} \right) \quad (S3)$$

- 10 where  $E_{PM_{2.5}}$  denotes the annual emissions of  $PM_{2.5}$ ;  $E_{SVOCs}$ ,  $E_{IVOCs}$ , and  $E_{POA}$  denote the emissions or emission factors of S/IVOCs and POA;  $F_{OC}$  denotes the mass fractions of OC to  $PM_{2.5}$ . Note that SVOC emissions in the present study were assumed to have been included in traditional POA emissions (Zheng et al., 2010; Liu et al., 2015; Dr. Qi Chen, Peking University, Personal Communication), while IVOC emissions have not  
15 been reported in current inventories. Thus, SVOC emissions were directly extracted from the traditional POA emissions. Additionally, in order to obtain localized parameters as much as possible, data of ratios of O/C, H/C, N/C, and OM/OC were extracted from field measurements conducted in China. The observed data of HOA (Hydrocarbon-like Organic Aerosols), COA (Cooking-like Organic Aerosols), and  
20 BBOA (Biomass burning Organic Aerosols) were used to calculate the four abovementioned ratios for on-road/off-road mobile sources, residential sources, and biomass burning, respectively, while data of field measured OA were used for industrial emissions and dust because measured OA for these two sources could not be identified in measurement data. The ratio of S/IVOCs to POA for all emission sources, except for  
25 biomass burning, were based on the relationship between the emissions or emission factors of S/IVOCs and POA measured from vehicle emissions owing to the lack of relevant information.

Additional details on the parameters involved in the VBS approach are listed as below:

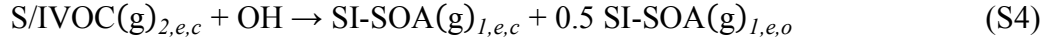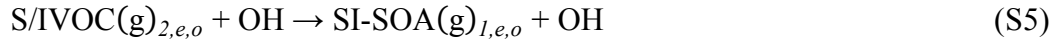

where (g) denotes gas phase; the subscript *l* denotes the low-volatility species ( $C^* = 0.01 \mu\text{g}/\text{m}^3$  at 298K and 1 atm), 2 denotes the high-volatility species ( $C^* = 10^5 \mu\text{g}/\text{m}^3$  at 298K and 1 atm); *e* denotes the emission categories, including biomass burning and other anthropogenic emissions; *c* denotes the non-oxygen (C, H, N) component of the species; *o* represents the oxygen component. Note that the addition of oxygen was only considered in Eq. (S4) in order to ensure that the mass growth was not calculated twice by the oxidation of non-oxygen and oxygen components of the same species.

5

10 Furthermore, the non-oxygen fraction of each species was calculated on the basis of the ratio of non-oxygen component to carbon component, which was derived from elemental ratios of O/C, H/C and N/C (Table 2 in the main text).

15

20

25

30

35

## S2. Supplementary figures and tables

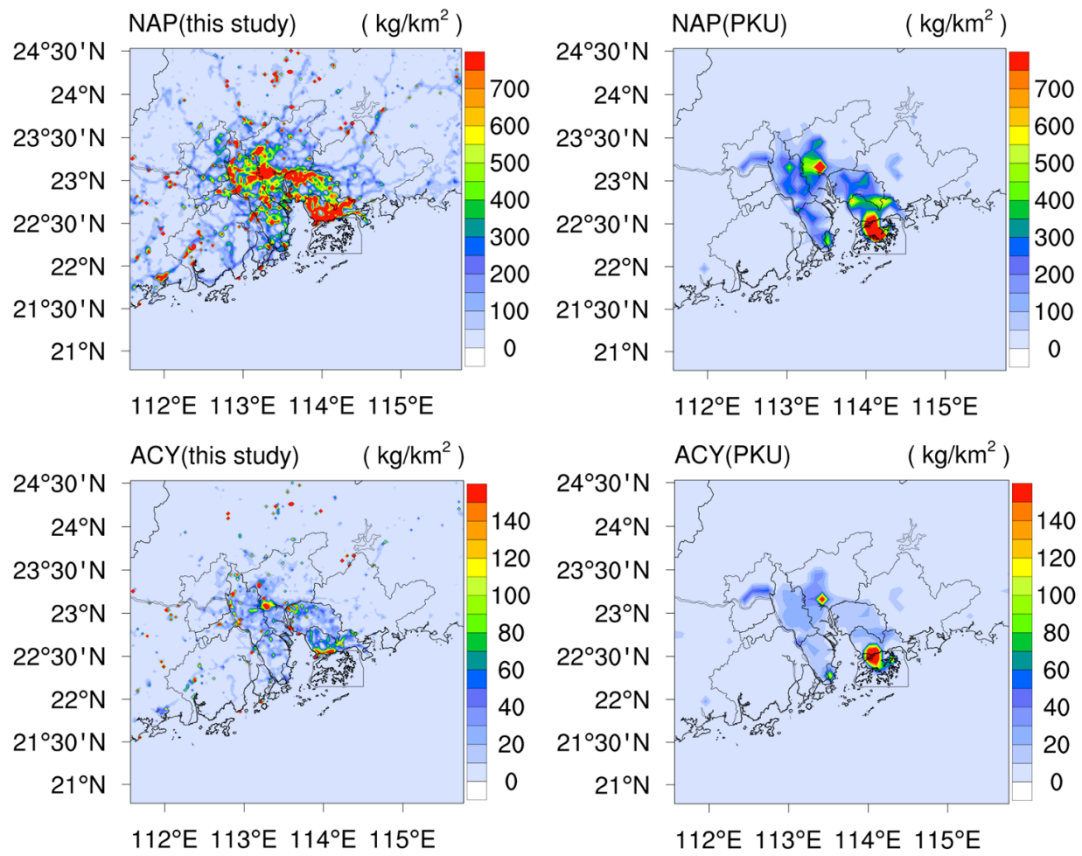

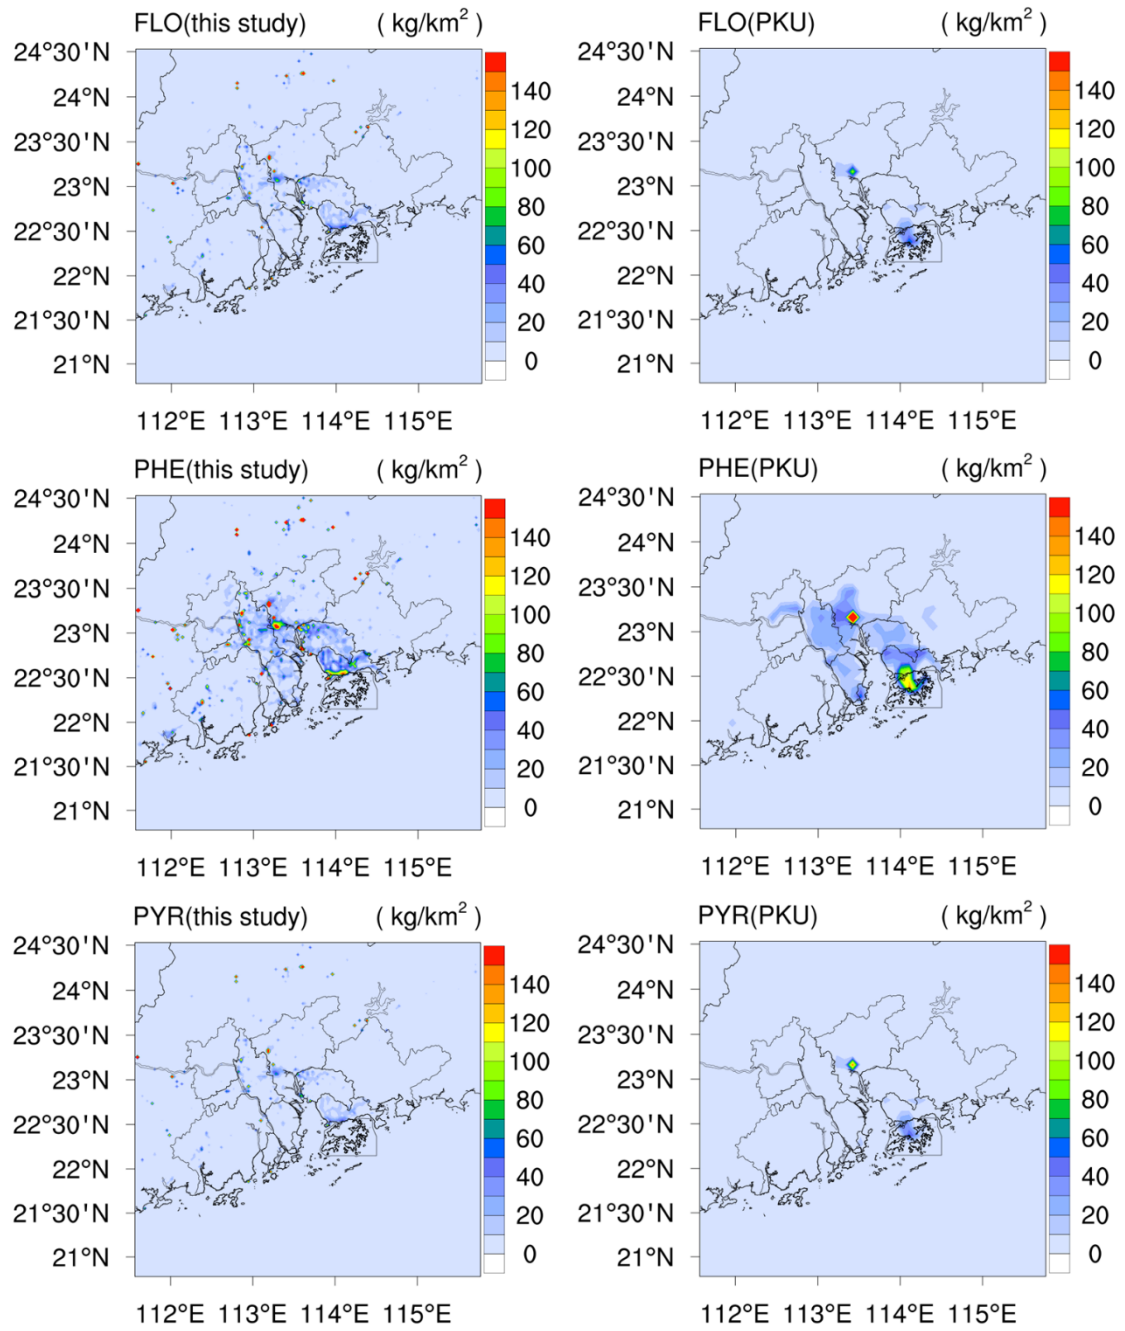

**Figure S1: Comparisons of spatial distribution of five individual PAH between emission inventory of this study and PKU (denoted as Shen's inventory).**

5

10

**Table S1: Comparisons of emissions of five individual PAH and total of them in the PRD region between emission inventory of this study and Shen's inventory (unit: t/year).**

| inventory          | Guangzhou | Shenzhen | Zhuhai | Foshan | Jiangmen | Dongguan | Zhongshan | Huizhou | Zhaoqing | PRD region |
|--------------------|-----------|----------|--------|--------|----------|----------|-----------|---------|----------|------------|
| naphthalene        |           |          |        |        |          |          |           |         |          |            |
| this study         | 2524.5    | 1585.7   | 392.9  | 1979.0 | 1214.1   | 1249.4   | 469.5     | 596.0   | 496.7    | 10507.8    |
| PKU                | 840.2     | 211.5    | 23.9   | 297.4  | 84.2     | 360.5    | 142.1     | 437.8   | 106.9    | 2504.5     |
| acenaphthylene     |           |          |        |        |          |          |           |         |          |            |
| this study         | 134.8     | 84.7     | 21.0   | 105.7  | 64.8     | 66.7     | 25.1      | 31.8    | 26.5     | 561        |
| PKU                | 126.4     | 52.7     | 3.4    | 44.2   | 28.1     | 30.5     | 18.3      | 52.2    | 38       | 393.8      |
| fluorene           |           |          |        |        |          |          |           |         |          |            |
| this study         | 38.3      | 24.0     | 6.0    | 30.0   | 18.4     | 18.9     | 7.1       | 9.0     | 7.5      | 159.3      |
| PKU                | 36.2      | 8.6      | 0.8    | 10.4   | 4.7      | 10.2     | 4.7       | 14.1    | 6.1      | 95.8       |
| phenanthrene       |           |          |        |        |          |          |           |         |          |            |
| this study         | 95.1      | 59.7     | 14.8   | 74.6   | 45.7     | 47.1     | 17.7      | 22.5    | 18.7     | 395.9      |
| PKU                | 139.8     | 35.4     | 4.0    | 43.6   | 18.1     | 41.3     | 18.3      | 57.1    | 23.8     | 381.4      |
| pyrene             |           |          |        |        |          |          |           |         |          |            |
| this study         | 29.5      | 18.5     | 4.6    | 23.1   | 14.2     | 14.6     | 5.5       | 7.0     | 5.8      | 122.6      |
| PKU                | 41.2      | 8.5      | 0.8    | 10.0   | 4.4      | 9.8      | 4.5       | 13.4    | 5.6      | 98.2       |
| total of five PAHs |           |          |        |        |          |          |           |         |          |            |
| this study         | 2822.1    | 1772.6   | 439.2  | 2212.3 | 1357.2   | 1396.7   | 524.9     | 666.3   | 555.3    | 11746.6    |
| PKU                | 1183.8    | 316.7    | 32.9   | 405.6  | 139.5    | 452.3    | 187.9     | 574.6   | 180.4    | 3473.7     |

## References

- Liu, F., Zhang, Q., Tong, D., Zheng, B., Li, M., Huo, H. and He, K. B.: High-resolution inventory of technologies, activities, and emissions of coal-fired power plants in China from 1990 to 2010, *Atmos. Chem. Phys.*, 15(23), 13299–13317, doi:10.5194/acp-15-13299-2015, 2015.
- 5 Zheng, J. Y., Zhong, L. J., Wang, T., Louie, P. K. K. and Li, Z. C.: Ground-level ozone in the Pearl River Delta region: Analysis of data from a recently established regional air quality monitoring network, *Atmos. Environ.*, 44(6), 814–823, doi:DOI 10.1016/j.atmosenv.2009.11.032, 2010.
